# Supplementary material for: Anti-Obesity Effect of Dictyophora indusiata Mushroom Polysaccharide (DIP) in High Fat Diet-Induced Obesity via Regulating Inflammatory Cascades and Intestinal Microbiome
Source: PubMed Central journal article supplement (PMC7717937; doi:10.3389/fendo.2020.558874), 2020-11-19
Supplement: DataSheet_1.pdf [file DataSheet_1.pdf]

## Supplementary Material

### 1.1 Supplementary Figures

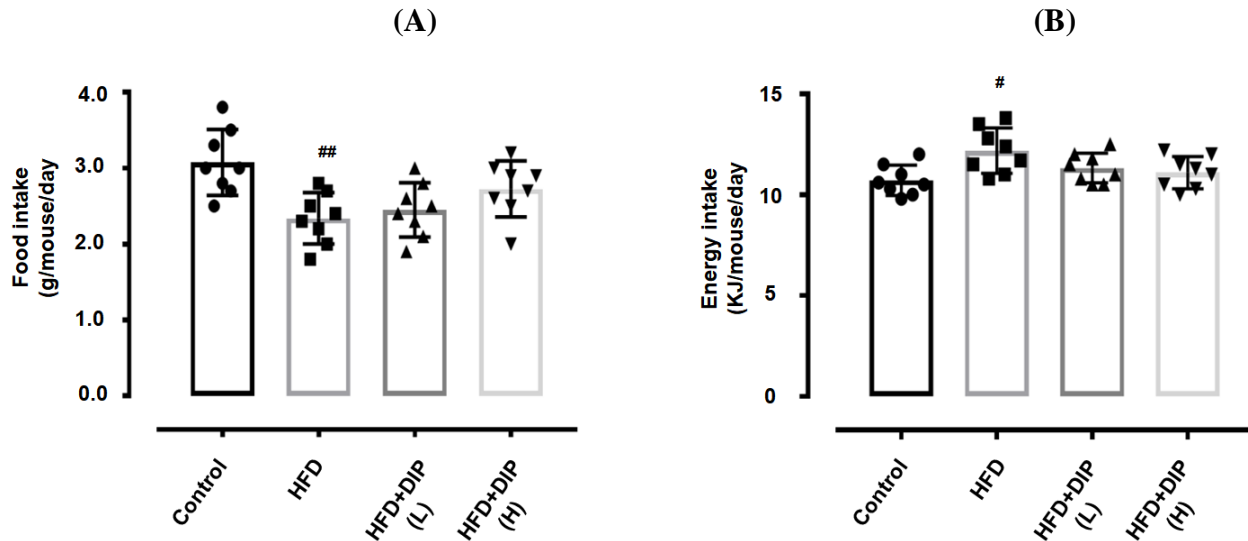

**Supplementary Figure S1.** Effects of DIP on food intake was monitored in HFD-fed mice. (A) Food intake and (B) Energy intake in different treatment groups ( $n=8$  each group). Statistical significance was assessed by one-way analysis of variance (ANOVA) followed by Tukey's multiple comparison test and is represented as follows: #  $p < 0.05$ , ##  $p < 0.01$  HFD group vs. control group.

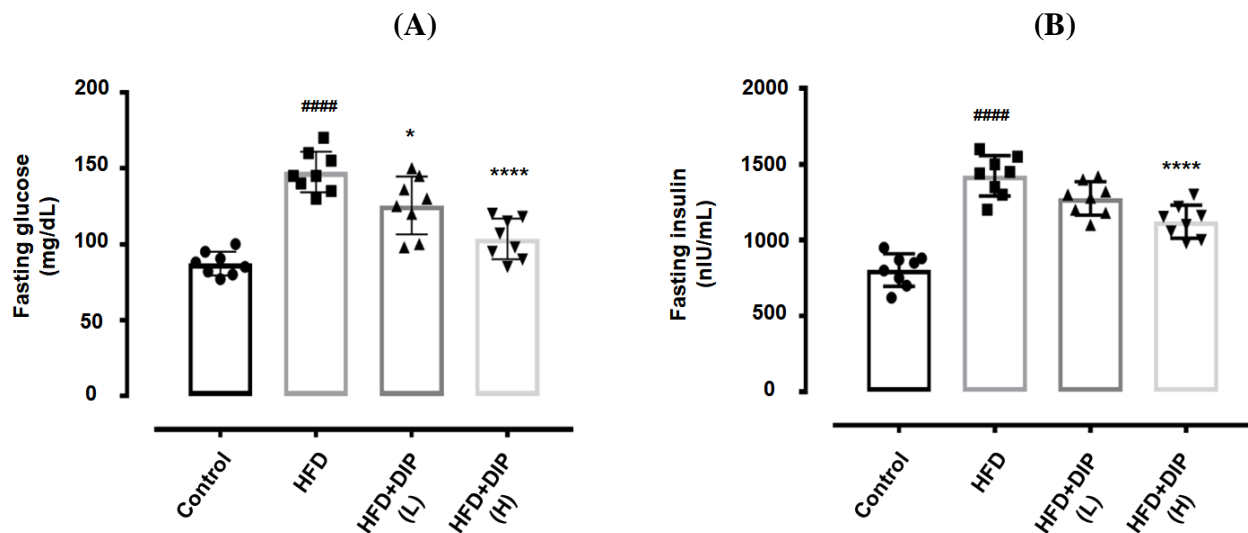

**Supplementary Figure S2: Protective Effect of DIP on fasting glucose and insulin levels in HFD induced obese mice.** (A) Fasting glucose, and (B) Fasting insulin levels were determined using glucose meter and commercial ELISA kit. The data are presented as the means  $\pm$  standard error of mean SEM ( $n = 8$ ). Statistical significance was assessed by one-way analysis of variance (ANOVA) followed by Tukey's multiple comparison test and is represented as follows: #####  $p < 0.0001$  HFD group vs. control group; \*  $p < 0.05$ , \*\*\*\*  $p < 0.0001$  HFD group vs HFD+DIP(L) or HFD+DIP(H) groups.

## 1.2 Supplementary Tables

**Supplementary Table S1: qRT-PCR primer sequences**

| Name                                    | Sequence                        |
|-----------------------------------------|---------------------------------|
| <b>TNF-<math>\alpha</math> Forward</b>  | 5'-TAGCCAGGAGGGAGAACAGA-3'      |
| <b>TNF-<math>\alpha</math> Reverse</b>  | 5'-TTTTCTGGAGGGAGATGTGG-3'      |
| <b>IL-1<math>\beta</math> Forward</b>   | 5'-TTGAAGAAGAGCCCATCCTC -3'     |
| <b>IL-1<math>\beta</math> Reverse</b>   | 5'-CAGCTCATATGGGTCCGAC -3'      |
| <b>IL-6 Forward</b>                     | 5'-CCGGAGAGGAGACTTCAC-3'        |
| <b>IL-6 Reverse</b>                     | 5'-TCCACGATTTCCAGAGA-3'         |
| <b>MCP-1 Forward</b>                    | 5'-TCACTGAAGCCAGCTCTCTCT -3'    |
| <b>MCP-1 Reverse</b>                    | 5'-GTGGGGCGTTAACTGCAT-3'        |
| <b>PPAR-<math>\gamma</math> Forward</b> | 5'-GCAGCTACTGCATGTGATCAAGA-3'   |
| <b>PPAR-<math>\gamma</math> Reverse</b> | 5'-GTCAGCGGGTGGGACTTTC-3'       |
| <b>C/EBP<math>\alpha</math> Forward</b> | 5'- CGCAAGAGCCGAGATAAAGC-3'     |
| <b>C/EBP<math>\alpha</math> Reverse</b> | 5'- CACGGCTCAGCTGTTCCA-3'       |
| <b>SREBP-1c Forward</b>                 | 5'-GATGTGCGAACTGGACACAG-3'      |
| <b>SREBP-1c Reverse</b>                 | 5'-CATAGGGGGCGTCAAACAG-3'       |
| <b>ACC-1 Forward</b>                    | 5'-GAGTGACTGCCGAAACATCTCTG-3'   |
| <b>ACC-1 Reverse</b>                    | 5'- GCAAGGAGGACAGAGTTTATCGTG-3' |
| <b>FAS Forward</b>                      | 5'-GCTGCGGAAACTTCAGGAAAT-3'     |
| <b>FAS Reverse</b>                      | 5'-AGAGACGTGTCACTCCTGGACTT-3'   |

**Supplementary Table S2: OTUs sequencing summary attained in the study**

| Groups              | Sample Size | Singleton % | Chimeras % | Clean tags | OTU,s | Coverage |
|---------------------|-------------|-------------|------------|------------|-------|----------|
| <b>Control.1</b>    | 98769       | 82.36       | 0.18       | 81313      | 637   | 1        |
| <b>Control.2</b>    | 105425      | 83.85       | 0.28       | 86249      | 573   | 1        |
| <b>Control.3</b>    | 104480      | 77.20       | 0.20       | 88935      | 669   | 1        |
| <b>Control.4</b>    | 101246      | 77.80       | 0.40       | 84518      | 690   | 1        |
| <b>HFD.1</b>        | 106129      | 80.17       | 0.55       | 84101      | 609   | 1        |
| <b>HFD.2</b>        | 102055      | 84.01       | 0.26       | 81602      | 568   | 1        |
| <b>HFD.3</b>        | 102656      | 77.35       | 0.20       | 88415      | 520   | 1        |
| <b>HFD.4</b>        | 99299       | 78.34       | 0.33       | 79712      | 575   | 1        |
| <b>HFD+DIP(L).1</b> | 105698      | 80.82       | 0.18       | 87102      | 536   | 1        |
| <b>HFD+DIP(L).2</b> | 100498      | 74.63       | 0.28       | 84514      | 690   | 1        |
| <b>HFD+DIP(L).3</b> | 109045      | 75.13       | 0.44       | 87037      | 650   | 1        |
| <b>HFD+DIP(L).4</b> | 104114      | 77.93       | 0.36       | 85528      | 685   | 1        |
| <b>HFD+DIP(H).1</b> | 98955       | 77.38       | 0.37       | 77690      | 651   | 1        |
| <b>HFD+DIP(H).2</b> | 103489      | 83.22       | 0.27       | 83185      | 598   | 1        |
| <b>HFD+DIP(H).3</b> | 104109      | 83.66       | 0.26       | 80345      | 591   | 1        |
| <b>HFD+DIP(H).4</b> | 98846       | 79.83       | 0.23       | 79337      | 756   | 1        |

**Supplementary Table S3:** Summary of alpha diversity indices

| <b>Groups</b>       | <b>Shannon</b> | <b>Simpson</b> | <b>Chao</b> | <b>ACE</b> | <b>Goods coverage</b> |
|---------------------|----------------|----------------|-------------|------------|-----------------------|
| <b>Control.1</b>    | 5.99           | 0.92           | 696.80      | 684.00     | 1.00                  |
| <b>Control.2</b>    | 5.99           | 0.94           | 568.57      | 564.62     | 1.00                  |
| <b>Control.3</b>    | 6.09           | 0.95           | 638.75      | 641.86     | 1.00                  |
| <b>Control.4</b>    | 6.49           | 0.97           | 688.50      | 681.47     | 1.00                  |
| <b>HFD.1</b>        | 6.25           | 0.97           | 572.14      | 572.47     | 1.00                  |
| <b>HFD.2</b>        | 6.26           | 0.97           | 517.76      | 521.13     | 1.00                  |
| <b>HFD.3</b>        | 5.63           | 0.93           | 574.83      | 587.17     | 1.00                  |
| <b>HFD.4</b>        | 6.84           | 0.98           | 742.19      | 744.56     | 1.00                  |
| <b>HFD+DIP(L).1</b> | 6.29           | 0.97           | 578.71      | 575.21     | 1.00                  |
| <b>HFD+DIP(L).2</b> | 5.41           | 0.91           | 573.56      | 582.40     | 1.00                  |
| <b>HFD+DIP(L).3</b> | 5.98           | 0.95           | 652.76      | 640.96     | 1.00                  |
| <b>HFD+DIP(L).4</b> | 4.01           | 0.79           | 504.10      | 500.54     | 1.00                  |
| <b>HFD+DIP(H).1</b> | 6.26           | 0.95           | 667.84      | 662.58     | 1.00                  |
| <b>HFD+DIP(H).2</b> | 6.60           | 0.98           | 649.10      | 637.87     | 1.00                  |
| <b>HFD+DIP(H).3</b> | 5.66           | 0.90           | 656.58      | 670.77     | 1.00                  |
| <b>HFD+DIP(H).4</b> | 6.38           | 0.97           | 550.79      | 555.29     | 1.00                  |

**Supplementary Table S4:** Number of OTUs at phylum, Class, Order, Family, Genus and Species level

| <b>Groups</b>       | <b>PHYLUM</b> | <b>CLASS</b> | <b>ORDER</b> | <b>FAMILY</b> | <b>GENUS</b> | <b>SPECIES</b> |
|---------------------|---------------|--------------|--------------|---------------|--------------|----------------|
| <b>Control.1</b>    | 563           | 563          | 563          | 435           | 208          | 35             |
| <b>Control.2</b>    | 498           | 498          | 498          | 401           | 194          | 33             |
| <b>Control.3</b>    | 575           | 575          | 575          | 453           | 202          | 30             |
| <b>Control.4</b>    | 598           | 598          | 598          | 476           | 199          | 34             |
| <b>HFD.1</b>        | 537           | 537          | 537          | 400           | 189          | 32             |
| <b>HFD.2</b>        | 515           | 515          | 515          | 397           | 211          | 34             |
| <b>HFD.3</b>        | 444           | 444          | 444          | 338           | 178          | 28             |
| <b>HFD.4</b>        | 510           | 510          | 510          | 420           | 202          | 32             |
| <b>HFD+DIP(L).1</b> | 473           | 473          | 473          | 413           | 231          | 41             |
| <b>HFD+DIP(L).2</b> | 604           | 604          | 604          | 443           | 236          | 54             |
| <b>HFD+DIP(L).3</b> | 570           | 570          | 570          | 462           | 247          | 51             |
| <b>HFD+DIP(L).4</b> | 583           | 583          | 583          | 446           | 202          | 35             |
| <b>HFD+DIP(H).1</b> | 577           | 577          | 577          | 436           | 211          | 48             |
| <b>HFD+DIP(H).2</b> | 514           | 514          | 514          | 432           | 204          | 36             |
| <b>HFD+DIP(H).3</b> | 525           | 525          | 525          | 466           | 193          | 30             |
| <b>HFD+DIP(H).4</b> | 661           | 661          | 661          | 524           | 244          | 52             |

Supplementary Table S5: Bacterial taxa at phylum level (%)

| Bacterial flora at phylum level (%) |        |        |        |        |        |        |        |        |              |              |              |              |              |              |              |              |
|-------------------------------------|--------|--------|--------|--------|--------|--------|--------|--------|--------------|--------------|--------------|--------------|--------------|--------------|--------------|--------------|
| Taxonomy                            | CTRL   |        |        |        | HFD    |        |        |        | HFD+DIP(L)   |              |              |              | HFD+DIP(H)   |              |              |              |
|                                     | CTRL.1 | CTRL.2 | CTRL.3 | CTRL.4 | HFD.1  | HFD.2  | HFD.3  | HFD.4  | HFD+DIP(L).1 | HFD+DIP(L).2 | HFD+DIP(L).3 | HFD+DIP(L).4 | HFD+DIP(H).1 | HFD+DIP(H).2 | HFD+DIP(H).3 | HFD+DIP(H).4 |
|                                     | %      | %      | %      | %      | %      | %      | %      | %      | %            | %            | %            | %            | %            | %            | %            | %            |
| Unassigned;Other                    | 0.10%  | 0.00%  | 0.10%  | 0.20%  | 0.10%  | 0.10%  | 0.00%  | 0.10%  | 0.10%        | 0.00%        | 0.00%        | 0.00%        | 0.00%        | 0.10%        | 0.40%        | 0.50%        |
| k__Bacteria;p__Actinobacteria       | 2.60%  | 2.10%  | 1.00%  | 1.10%  | 2.30%  | 0.90%  | 0.60%  | 2.00%  | 10.70%       | 14.30%       | 5.30%        | 3.80%        | 3.90%        | 2.90%        | 0.80%        | 2.60%        |
| k__Bacteria;p__Bacteroidetes        | 63.90% | 37.50% | 57.00% | 70.10% | 32.80% | 37.60% | 12.50% | 35.70% | 25.40%       | 13.20%       | 16.90%       | 27.50%       | 23.00%       | 47.20%       | 71.60%       | 46.40%       |
| k__Bacteria;p__Cyanobacteria        | 0.10%  | 0.00%  | 0.00%  | 0.00%  | 0.00%  | 0.10%  | 0.00%  | 0.00%  | 0.00%        | 0.00%        | 0.00%        | 0.00%        | 0.00%        | 0.00%        | 0.00%        | 0.00%        |
| k__Bacteria;p__Deferribacteres      | 0.20%  | 0.20%  | 1.30%  | 0.20%  | 0.20%  | 0.10%  | 0.10%  | 0.00%  | 0.30%        | 1.20%        | 0.90%        | 0.30%        | 0.00%        | 0.00%        | 0.20%        | 3.90%        |
| k__Bacteria;p__Firmicutes           | 22.90% | 48.30% | 26.00% | 20.90% | 46.60% | 52.50% | 81.80% | 54.40% | 44.90%       | 62.40%       | 60.90%       | 61.50%       | 70.70%       | 38.20%       | 22.10%       | 30.70%       |
| k__Bacteria;p__Fusobacteria         | 0.00%  | 0.00%  | 0.00%  | 0.10%  | 0.10%  | 0.10%  | 0.00%  | 0.00%  | 0.00%        | 0.00%        | 0.00%        | 0.00%        | 0.00%        | 0.40%        | 0.00%        | 0.20%        |
| k__Bacteria;p__Proteobacteria       | 2.90%  | 6.60%  | 13.30% | 6.60%  | 12.70% | 8.00%  | 4.80%  | 7.40%  | 18.30%       | 7.90%        | 15.70%       | 6.00%        | 1.90%        | 9.00%        | 4.40%        | 15.20%       |
| k__Bacteria;p__Spirochaetes         | 0.00%  | 0.00%  | 0.40%  | 0.00%  | 0.00%  | 0.00%  | 0.00%  | 0.00%  | 0.00%        | 0.00%        | 0.00%        | 0.00%        | 0.00%        | 0.00%        | 0.40%        | 0.20%        |
| k__Bacteria;p__Synergistetes        | 0.00%  | 0.00%  | 0.00%  | 0.00%  | 0.00%  | 0.00%  | 0.00%  | 0.00%  | 0.00%        | 0.00%        | 0.00%        | 0.00%        | 0.00%        | 0.10%        | 0.10%        | 0.00%        |
| k__Bacteria;p__TM7                  | 6.60%  | 3.40%  | 0.40%  | 0.70%  | 5.00%  | 0.60%  | 0.10%  | 0.30%  | 0.20%        | 0.60%        | 0.20%        | 0.70%        | 0.30%        | 0.20%        | 0.00%        | 0.30%        |
| k__Bacteria;p__Tenericutes          | 0.60%  | 0.40%  | 0.30%  | 0.10%  | 0.30%  | 0.10%  | 0.20%  | 0.00%  | 0.00%        | 0.30%        | 0.10%        | 0.20%        | 0.10%        | 0.00%        | 0.00%        | 0.00%        |
| k__Bacteria;p__Verrucomicrobia      | 0.00%  | 1.50%  | 0.00%  | 0.00%  | 0.00%  | 0.00%  | 0.00%  | 0.00%  | 0.00%        | 0.00%        | 0.00%        | 0.00%        | 0.00%        | 1.80%        | 0.00%        | 0.00%        |

Supplementary Table S6: Bacterial taxa at class level (%)

| Bacterial flora at class level (%)                     |        |        |        |        |        |        |        |        |              |              |              |              |              |              |              |              |
|--------------------------------------------------------|--------|--------|--------|--------|--------|--------|--------|--------|--------------|--------------|--------------|--------------|--------------|--------------|--------------|--------------|
| Taxonomy                                               | CTRL   |        |        |        | HFD    |        |        |        | HFD+DIP(L)   |              |              |              | HFD+DIP(H)   |              |              |              |
|                                                        | CTRL.1 | CTRL.2 | CTRL.3 | CTRL.4 | HFD.1  | HFD.2  | HFD.3  | HFD.4  | HFD+DIP(L).1 | HFD+DIP(L).2 | HFD+DIP(L).3 | HFD+DIP(L).4 | HFD+DIP(H).1 | HFD+DIP(H).2 | HFD+DIP(H).3 | HFD+DIP(H).4 |
|                                                        | %      | %      | %      | %      | %      | %      | %      | %      | %            | %            | %            | %            | %            | %            | %            | %            |
| Unassigned;Other;Other                                 | 0.10%  | 0.00%  | 0.10%  | 0.20%  | 0.10%  | 0.10%  | 0.00%  | 0.10%  | 0.10%        | 0.00%        | 0.00%        | 0.00%        | 0.00%        | 0.10%        | 0.40%        | 0.50%        |
| k__Bacteria;p__Actinobacteria;c__Actinobacteria        | 0.80%  | 0.40%  | 0.20%  | 0.10%  | 1.00%  | 0.00%  | 0.20%  | 0.20%  | 10.40%       | 14.10%       | 5.00%        | 3.10%        | 3.10%        | 0.50%        | 0.10%        | 1.50%        |
| k__Bacteria;p__Actinobacteria;c__Coriobacteria         | 1.80%  | 1.70%  | 0.80%  | 1.00%  | 1.30%  | 0.90%  | 0.40%  | 1.80%  | 0.40%        | 0.20%        | 0.30%        | 0.80%        | 0.80%        | 2.40%        | 0.70%        | 1.10%        |
| k__Bacteria;p__Bacteroidetes;c__Bacteroidia            | 63.90% | 37.50% | 57.00% | 70.10% | 32.80% | 37.60% | 12.50% | 35.70% | 25.40%       | 13.20%       | 16.90%       | 27.50%       | 23.00%       | 47.20%       | 71.60%       | 46.40%       |
| k__Bacteria;p__Bacteroidetes;c__Flavobacteriia         | 0.00%  | 0.00%  | 0.00%  | 0.00%  | 0.00%  | 0.00%  | 0.00%  | 0.00%  | 0.00%        | 0.00%        | 0.00%        | 0.00%        | 0.00%        | 0.00%        | 0.00%        | 0.00%        |
| k__Bacteria;p__Bacteroidetes;c__Sphingobacteriia       | 0.00%  | 0.00%  | 0.00%  | 0.00%  | 0.00%  | 0.00%  | 0.00%  | 0.00%  | 0.00%        | 0.00%        | 0.00%        | 0.00%        | 0.00%        | 0.00%        | 0.00%        | 0.00%        |
| k__Bacteria;p__Cyanobacteria;c__4C0d-2                 | 0.00%  | 0.00%  | 0.00%  | 0.00%  | 0.00%  | 0.10%  | 0.00%  | 0.00%  | 0.00%        | 0.00%        | 0.00%        | 0.00%        | 0.00%        | 0.00%        | 0.00%        | 0.00%        |
| k__Bacteria;p__Cyanobacteria;c__Chloroplast            | 0.10%  | 0.00%  | 0.00%  | 0.00%  | 0.00%  | 0.00%  | 0.00%  | 0.00%  | 0.00%        | 0.00%        | 0.00%        | 0.00%        | 0.00%        | 0.00%        | 0.00%        | 0.00%        |
| k__Bacteria;p__Deferribacteres;c__Deferribacteres      | 0.20%  | 0.20%  | 1.30%  | 0.20%  | 0.10%  | 0.10%  | 0.10%  | 0.00%  | 0.30%        | 1.20%        | 0.90%        | 0.30%        | 0.00%        | 0.00%        | 0.20%        | 3.90%        |
| k__Bacteria;p__Firmicutes;c__Bacilli                   | 4.90%  | 15.20% | 1.50%  | 2.10%  | 30.40% | 32.30% | 69.60% | 44.90% | 13.80%       | 22.60%       | 18.50%       | 38.20%       | 21.80%       | 10.40%       | 6.00%        | 8.90%        |
| k__Bacteria;p__Firmicutes;c__Clostridia                | 17.60% | 32.80% | 24.30% | 18.70% | 15.70% | 19.40% | 12.00% | 9.10%  | 28.90%       | 39.20%       | 41.30%       | 23.10%       | 46.70%       | 27.60%       | 12.70%       | 20.40%       |
| k__Bacteria;p__Firmicutes;c__Erysipelotrichi           | 0.40%  | 0.30%  | 0.20%  | 0.10%  | 0.40%  | 0.70%  | 0.20%  | 0.40%  | 2.20%        | 0.60%        | 1.10%        | 0.20%        | 2.20%        | 0.20%        | 3.40%        | 1.40%        |
| k__Bacteria;p__Fusobacteria;c__Fusobacteriia           | 0.00%  | 0.00%  | 0.00%  | 0.10%  | 0.10%  | 0.10%  | 0.00%  | 0.00%  | 0.00%        | 0.00%        | 0.00%        | 0.00%        | 0.00%        | 0.40%        | 0.00%        | 0.20%        |
| k__Bacteria;p__Proteobacteria;c__Alphaproteobacteria   | 0.00%  | 0.00%  | 0.10%  | 0.00%  | 0.00%  | 0.00%  | 0.00%  | 0.00%  | 0.70%        | 0.00%        | 0.10%        | 0.00%        | 0.20%        | 0.00%        | 0.70%        | 0.30%        |
| k__Bacteria;p__Proteobacteria;c__Betaproteobacteria    | 0.10%  | 0.40%  | 0.10%  | 0.10%  | 0.30%  | 0.40%  | 0.00%  | 2.70%  | 0.10%        | 0.20%        | 0.20%        | 0.20%        | 0.20%        | 2.80%        | 0.10%        | 1.00%        |
| k__Bacteria;p__Proteobacteria;c__Deltaproteobacteria   | 1.50%  | 2.70%  | 1.20%  | 2.30%  | 1.70%  | 0.50%  | 0.30%  | 1.50%  | 3.00%        | 6.20%        | 6.40%        | 2.10%        | 0.50%        | 3.30%        | 0.80%        | 2.40%        |
| k__Bacteria;p__Proteobacteria;c__Epsilonproteobacteria | 0.20%  | 0.30%  | 0.50%  | 0.30%  | 0.20%  | 0.50%  | 0.70%  | 0.20%  | 2.70%        | 0.60%        | 0.60%        | 0.20%        | 0.00%        | 0.20%        | 0.20%        | 8.80%        |
| k__Bacteria;p__Proteobacteria;c__Gammaproteobacteria   | 1.10%  | 3.20%  | 11.40% | 3.90%  | 10.50% | 6.50%  | 3.80%  | 3.00%  | 11.70%       | 0.90%        | 8.40%        | 3.50%        | 1.10%        | 2.80%        | 2.60%        | 2.60%        |
| k__Bacteria;p__Spirochaetes;c__Spirochaetes            | 0.00%  | 0.00%  | 0.50%  | 0.00%  | 0.00%  | 0.00%  | 0.00%  | 0.00%  | 0.00%        | 0.00%        | 0.00%        | 0.00%        | 0.00%        | 0.00%        | 0.40%        | 0.00%        |
| k__Bacteria;p__Spirochaetes;c__[Brachyspirae]          | 0.00%  | 0.00%  | 0.00%  | 0.00%  | 0.00%  | 0.00%  | 0.00%  | 0.00%  | 0.00%        | 0.00%        | 0.00%        | 0.00%        | 0.00%        | 0.00%        | 0.00%        | 0.20%        |
| k__Bacteria;p__Synergistetes;c__Synergistia            | 0.00%  | 0.00%  | 0.00%  | 0.00%  | 0.00%  | 0.00%  | 0.00%  | 0.00%  | 0.00%        | 0.00%        | 0.00%        | 0.00%        | 0.00%        | 0.10%        | 0.10%        | 0.00%        |
| k__Bacteria;p__TM7;c__TM7-3                            | 6.60%  | 3.40%  | 0.40%  | 0.70%  | 5.00%  | 0.60%  | 0.10%  | 0.30%  | 0.20%        | 0.60%        | 0.20%        | 0.70%        | 0.30%        | 0.20%        | 0.00%        | 0.30%        |
| k__Bacteria;p__Tenericutes;c__Mollicutes               | 0.60%  | 0.40%  | 0.30%  | 0.10%  | 0.30%  | 0.10%  | 0.20%  | 0.00%  | 0.00%        | 0.30%        | 0.10%        | 0.20%        | 0.10%        | 0.00%        | 0.00%        | 0.00%        |
| k__Bacteria;p__Verrucomicrobia;c__Verrucomicrobiae     | 0.00%  | 1.50%  | 0.00%  | 0.00%  | 0.00%  | 0.00%  | 0.00%  | 0.00%  | 0.00%        | 0.00%        | 0.00%        | 0.00%        | 0.00%        | 1.80%        | 0.00%        | 0.00%        |
